# Supplementary material for: Comparison of microbial community structures in soils with woody organic amendments and soils with traditional local organic amendments in Ningxia of Northern China
Source: PeerJ. 2019 May 8;7:e6854. doi: 10.7717/peerj.6854 (PMC6511227; doi:10.7717/peerj.6854)
Supplement: Dataset S1 — Raw data exported from QIIME applied for data anaysis and preparation for microbial α-diversity after 7 and 15 months respectively [file peerj-07-6854-s004.xlsx]

## Sheet: bacterial OTU after 7 months
#OTU	OTU_479	OTU_166	OTU_15	OTU_581	OTU_507	OTU_341	OTU_34	OTU_64	OTU_568	OTU_30	OTU_1607	OTU_3764	OTU_2642	OTU_811	OTU_951	OTU_758	OTU_9	OTU_405	OTU_1420	OTU_199	OTU_899	OTU_91	OTU_13	OTU_1332	OTU_839	OTU_787	OTU_43	OTU_684	OTU_254	OTU_6	OTU_22	OTU_340	OTU_4349	OTU_2732	OTU_2336	OTU_3491	OTU_1141	OTU_8	OTU_3094	OTU_1134	OTU_583	OTU_365	OTU_1872	OTU_3527	OTU_241	OTU_93	OTU_262	OTU_4240	OTU_293
Control	3	66	124	18	2	49	458	4	6	7	36	3	1	16	227	11	55	11	8	27	0	83	233	4	5	149	32	0	14	36	37	4	14	5	1	1	2	206	0	6	6	15	8	0	80	37	54	1	10
Control	5	22	49	12	5	26	41	22	3	1	3	0	1	3	25	1	83	13	1	15	3	34	7	8	7	24	91	8	28	158	121	1	27	0	0	0	0	103	2	2	7	28	0	0	5	2	6	0	15
Control	2	7	47	2	14	49	48	4	3	2	19	0	0	17	45	17	11	7	4	19	0	80	114	1	2	24	10	1	7	12	7	1	6	4	0	1	0	33	1	5	1	17	5	0	36	5	28	0	10
Control	2	10	145	21	3	22	62	1	7	5	10	1	0	3	38	8	107	10	0	16	1	37	68	1	3	31	49	0	13	34	35	0	25	2	0	1	1	88	0	1	4	16	1	0	17	2	26	2	4
CM	0	20	39	2	3	28	25	4	1	5	1	0	1	4	33	2	21	3	4	7	37	39	368	1	0	34	30	1	18	4	17	2	249	3	0	0	12	513	0	1	4	20	3	0	7	0	19	0	3
CM	0	3	46	5	5	22	12	2	1	3	7	0	0	4	12	4	26	3	12	3	0	32	824	1	3	32	4	4	12	6	20	4	50	3	0	0	0	185	1	1	3	1	3	0	0	0	8	1	4
CM	1	9	32	3	2	27	29	0	0	10	6	2	1	4	69	2	30	2	1	10	0	41	136	6	1	40	18	1	20	8	26	1	269	0	0	0	45	946	1	1	7	3	0	0	25	1	14	0	4
CM	0	15	79	8	1	33	27	9	3	9	4	0	0	14	43	12	40	5	0	5	0	43	39	13	0	53	12	0	16	9	17	1	183	4	1	0	4	488	14	0	4	13	1	0	0	3	18	0	1
PB	0	6	65	9	1	24	22	22	0	3	2	0	0	0	27	5	55	0	2	20	0	25	18	0	8	12	266	0	13	165	17	1	0	0	1	0	0	59	0	1	6	27	2	0	12	1	14	0	3
PB	4	4	42	17	1	28	6	47	0	1	0	0	0	3	12	1	99	1	2	17	0	49	2	1	0	12	131	0	9	147	26	0	0	0	2	0	0	8	1	1	6	28	1	0	0	0	21	0	18
PB	6	6	32	4	2	23	15	72	1	1	0	0	0	2	26	3	118	1	1	22	2	17	2	0	8	4	132	0	16	178	30	0	1	0	0	0	0	38	0	0	5	20	0	0	2	1	7	0	12
PB	0	1	15	11	0	16	10	25	2	1	1	14	1	0	45	0	160	0	0	15	0	13	0	0	4	5	255	0	11	303	65	3	0	1	0	0	0	144	2	0	5	13	1	0	3	1	18	0	11
CS	2	23	109	15	2	124	38	3	21	5	7	0	0	10	29	6	122	8	0	17	0	96	14	2	7	15	89	5	47	96	68	2	0	2	1	0	0	52	2	2	5	16	0	0	3	1	28	0	11
CS	7	30	102	18	1	34	64	15	5	2	2	0	0	3	68	1	96	4	0	13	0	44	402	0	5	31	63	2	34	114	66	3	4	0	2	0	0	83	12	1	6	15	0	0	3	2	19	0	11
CS	3	49	112	16	0	58	40	2	3	8	3	0	1	4	27	2	290	0	0	23	0	51	10	0	4	15	109	1	10	211	99	1	0	1	1	0	0	33	0	0	1	3	0	0	3	5	23	0	9
CS	2	25	75	13	2	86	51	22	17	11	2	0	0	2	36	5	181	14	0	20	0	64	2	0	2	29	50	4	40	118	74	3	3	1	1	0	0	60	0	2	6	12	1	0	0	2	16	0	18
[truncated: 4,155 more columns]

## Sheet: bacterial OTU after 15 months
treatment	OTU_2008	OTU_9	OTU_621	OTU_94	OTU_397	OTU_120	OTU_32	OTU_135	OTU_3398	OTU_377	OTU_3417	OTU_4	OTU_784	OTU_118	OTU_1347	OTU_49	OTU_2738	OTU_2318	OTU_33	OTU_1868	OTU_8	OTU_544	OTU_2101	OTU_1112	OTU_318	OTU_74	OTU_136	OTU_66	OTU_7075	OTU_689	OTU_40	OTU_186	OTU_177	OTU_1	OTU_1302	OTU_21	OTU_22	OTU_1155	OTU_20	OTU_375	OTU_345	OTU_1822	OTU_715	OTU_786	OTU_65	OTU_6540	OTU_19	OTU_233	OTU_4787
Control	4	1417	23	22	33	5	114	149	4	242	75	519	15	1730	97	106	17	292	1009	5	461	8	5	27	115	21	84	79	3	61	381	30	106	2244	16	234	175	1	165	75	13	21	15	2	261	43	161	72	2
Control	2	55	0	15	2	1	40	146	2	19	15	498	3	27	75	29	14	82	176	1	69	19	4	4	133	18	23	24	4	2	64	29	15	22	7	122	75	12	33	71	139	12	14	4	92	4	41	102	0
Control	6	31	4	27	14	7	79	211	4	152	18	3085	42	168	82	106	26	353	1462	1	362	1	23	67	251	31	149	68	2	1	263	38	121	75	23	214	163	4	68	82	22	11	87	4	323	6	2048	70	0
Control	23	38	3	15	21	7	91	422	18	52	48	1666	32	40	51	64	45	96	474	2	326	9	11	31	108	29	101	96	5	47	203	59	76	34	27	218	316	14	135	259	10	33	5	3	379	21	83	57	3
CM	0	12	9	50	2	0	100	94	0	20	110	179	2	7	16	95	2	3	436	30	1154	6	10	9	174	167	16	17	1	92	146	62	19	34	2	36	55	6	104	36	2	0	20	14	49	2	41	107	0
CM	1	2733	24	98	2	8	89	235	4	31	232	454	14	41	41	103	1	14	718	13	1657	6	5	24	695	222	31	42	0	1	201	153	27	1363	19	44	35	44	107	62	89	3	12	46	88	3	76	206	0
CM	1	67	8	128	1	4	57	96	0	34	113	142	16	15	15	85	2	9	398	20	1863	3	4	13	140	220	11	29	0	133	159	96	27	174	6	27	24	14	66	24	22	3	9	14	47	2	72	129	0
CM	1	887	7	24	5	5	47	45	1	19	32	455	6	19	12	107	0	11	640	28	1601	2	3	8	150	74	15	12	0	1	76	31	9	5180	1	30	18	6	40	27	17	1	10	17	67	2	43	28	0
PB	8	53	6	152	37	98	936	657	1	10	72	310	0	68	145	44	4	127	337	1	804	7	31	23	182	64	243	399	3	2	255	222	303	75	29	742	206	11	106	47	22	42	7	10	132	3	734	83	0
PB	1	13	5	80	21	16	481	168	1	7	42	123	0	16	49	33	0	42	99	0	446	18	10	5	64	22	129	188	2	2	91	84	135	27	4	239	52	1	200	22	15	7	2	3	76	2	568	71	0
PB	2	27	42	59	37	35	812	413	1	7	47	86	0	31	143	46	1	148	235	1	615	38	24	28	80	22	132	415	0	1	222	102	240	39	13	689	123	4	254	42	11	20	1	2	103	7	760	53	0
PB	8	16	10	32	15	36	351	151	0	1	26	54	0	39	37	16	0	207	84	0	355	5	5	12	81	9	115	208	0	1	87	46	70	205	9	320	79	2	36	14	9	6	2	2	69	2	302	26	0
CS	0	14	6	70	10	46	371	321	1	5	27	17	4	52	24	18	12	40	104	0	138	6	19	12	71	14	31	238	0	1	197	224	155	23	15	198	20	2	176	14	3	8	2	0	32	3	495	16	0
CS	0	25	2	129	15	67	283	319	0	31	53	37	8	54	63	125	9	82	383	1	602	2	23	24	91	20	57	153	0	0	298	235	149	44	3	285	47	13	125	40	15	9	2	5	62	3	453	43	0
CS	3	28	24	89	33	133	646	647	0	7	78	36	2	28	69	51	11	94	187	2	221	9	17	38	141	9	105	355	0	1	313	330	175	50	8	822	165	1	454	36	6	28	0	2	94	5	763	40	0
CS	8	50	21	183	86	98	1205	390	0	21	70	86	3	17	111	39	2	212	204	0	521	26	30	30	120	28	77	369	0	1	199	354	229	54	12	843	150	8	1071	49	32	13	1	3	102	17	2037	47	0
[truncated: 5,000 more columns]

## Sheet: fungal OTU after 7 months
treatment	OTU_13	OTU_15	OTU_1	OTU_4	OTU_24	OTU_74	OTU_29	OTU_1295	OTU_2	OTU_40	OTU_41	OTU_21	OTU_10	OTU_12	OTU_11	OTU_617	OTU_216	OTU_161	OTU_55	OTU_39	OTU_81	OTU_23	OTU_46	OTU_562	OTU_7	OTU_25	OTU_16	OTU_20	OTU_91	OTU_9	OTU_31	OTU_5	OTU_177	OTU_127	OTU_47	OTU_339	OTU_1979	OTU_1125	OTU_38	OTU_105	OTU_215	OTU_19	OTU_56	OTU_262	OTU_118	OTU_518	OTU_106	OTU_52	OTU_363
Control	727	900	11630	2146	133	480	7068	9	1724	721	2914	1046	5300	9771	392	5	12	21	55	841	120	386	860	4	1400	151	192	419	41	487	164	915	364	13	970	1	3	4	401	749	36	582	196	62	247	4	51	95	2
Control	351	982	27220	2374	411	149	285	10	3650	292	8	1261	829	1122	3065	0	129	80	237	47	920	520	718	0	2742	1771	743	1405	86	881	2	3653	0	20	145	1	0	8	680	9	38	909	130	0	0	16	141	434	0
Control	40	1132	24520	385	17	8	131	4	160	986	135	645	4300	3953	168	4	39	0	53	94	270	78	383	0	281	38	38	50	4	111	2209	234	0	0	193	92	0	0	105	3	10	96	27	75	417	1	17	37	0
Control	458	1524	33480	1626	99	14	115	2	880	366	262	722	411	309	273	3	38	14	68	48	119	202	103	0	1186	86	155	319	38	492	73	578	36	11	55	1	1	0	204	4	15	419	70	15	81	2	36	71	5
CM	22	114	17980	178	859	8	71	0	493	189	4	548	2195	3640	52	1	6	18	9	4238	23	52	32	0	144	5	440	36	2	2568	65	95	0	12	476	61	26	0	122	2	1	22	18	9	0	1	6	45	9
CM	0	262	168	11	673	7	1766	0	236	34	12	255	1050	11	302	0	9	4	2	22	11	20	13	0	127	2	339	1	1	1942	3628	5	0	3	1102	58	2	0	29	0	4	1	7	0	0	0	62	5	9
CM	32	70	4929	295	15	2	75	0	182	24	12	73	148	28	336	0	31	5	6	8	11	29	6	0	208	6	195	47	14	145	1	106	0	3	19	5	13	0	76	1	0	60	8	4	0	0	11	15	3
CM	97	314	7402	874	1393	5	1259	2	2161	126	1213	1628	329	107	520	1	12	9	30	65	99	102	142	0	689	90	2317	213	74	3503	110	309	0	31	18	2	8	0	470	1	6	213	36	20	0	2	75	250	6
PB	7267	453	9064	3136	118	10	8	0	4631	259	1	580	1058	822	116	0	3	4	5	51	5	486	11	26	7153	19	58	15	8	372	0	57	0	3	57	2	0	0	248	14	20	1047	234	0	0	5	29	23	16
PB	608	563	8135	3662	20	119	2	2	5419	17	0	3531	1148	16	5	0	4	4	1866	10	61	963	149	0	10470	10	12	6004	18	3683	0	1408	0	0	14	1	0	0	283	0	74	343	369	0	0	11	16	39	4
PB	24	495	3894	321	1	1	0	5	1803	335	3	991	302	24	9	0	0	4	11	30	13	368	8	0	6830	17	53	15	18	399	1	558	0	0	5	0	0	0	239	0	12	45	311	1	0	8	15	34	0
PB	98	388	1773	1245	0	0	1	0	980	40	1	1485	18	6	2	0	2	0	3	0	2	23	1	0	552	6	2	3	1	43	0	24	0	0	0	0	0	0	3	0	5	162	149	0	0	0	0	0	1
CS	58	2130	8540	357	693	14	44	1	734	44	0	511	20	4	18	0	2	44	7	0	181	334	68	0	336	102	1068	0	4	528	0	404	0	20	0	3	0	0	126	0	14	3	64	0	1	1	121	7	0
CS	106	590	4209	292	821	460	18	3	3792	462	5	435	149	32	3327	15	5	138	74	9	371	385	199	0	1797	730	441	68	5	720	1	771	0	25	12	0	1	1	468	0	5	82	39	0	0	0	1023	67	0
CS	13	132	200	295	346	9	0	0	261	41	33	185	24	0	119	1	1	6	2	4	13	80	16	0	76	504	180	1	0	185	0	108	0	49	7	0	0	0	41	0	3	31	14	3	0	0	2	1	0
CS	90	283	3584	219	515	15	1	0	688	91	4	221	26	2	242	18	0	2	16	2	20	206	20	0	228	251	186	115	1	58	1	1028	0	53	3	0	3	0	70	0	1	22	59	1	0	0	6	15	3
[truncated: 1,626 more columns]

## Sheet: fungal OTU after 15 months
treatment	OTU_11	OTU_26	OTU_149	OTU_1	OTU_45	OTU_82	OTU_1842	OTU_49	OTU_192	OTU_143	OTU_153	OTU_2	OTU_1407	OTU_175	OTU_38	OTU_448	OTU_127	OTU_12	OTU_109	OTU_928	OTU_432	OTU_66	OTU_110	OTU_61	OTU_271	OTU_187	OTU_172	OTU_128	OTU_122	OTU_91	OTU_181	OTU_214	OTU_27	OTU_160	OTU_431	OTU_105	OTU_734	OTU_509	OTU_219	OTU_641	OTU_1524	OTU_68	OTU_2013	OTU_29	OTU_5	OTU_294	OTU_873	OTU_224	OTU_6
Control	2776	10030	1083	18280	2708	5304	124	3706	368	1024	122	4576	5	1106	623	92	2047	2468	168	16	76	65	3	473	71	9	889	32	513	525	332	65	1458	64	6	10	43	112	236	68	6	441	1	46	21	178	43	83	157
Control	1577	1177	2	1944	57	18	1	64	0	3	21	4633	1	71	1170	0	4	738	67	0	0	866	0	34	6	4	16	5	0	70	37	10	1086	9	3	228	17	0	26	1	1	183	0	35	7	0	0	40	57
Control	5165	7	1	5545	93	3	0	75	6	2	486	11610	2	127	3752	0	0	16380	66	0	13	66	0	117	2	3	11	18	2163	65	8	2	141	6	2	1	14	0	122	0	1	236	1	17	16	0	0	19	157
Control	1694	639	90	872	894	0	0	5	1	29	16	1387	15	2525	799	0	23	1753	102	0	10	50	0	10	20	3	12	15	11	69	29	0	309	14	2	1	4	0	30	0	0	452	1	38	5	435	0	69	232
CM	348	13	0	128	567	1	0	99	0	7	2	306	0	1	3	0	1	388	551	0	1	41	2	1770	37	21	22	9	8	11	19	10	396	1311	0	0	1	0	40	0	0	2619	0	383	9	0	0	89	3097
CM	382	968	0	5511	235	3	13	344	9	12	30	1141	0	3	610	0	0	586	133	0	0	235	1	1636	22	12	15	15	2	238	51	93	144	56	0	3297	9	0	27	0	1	830	0	441	11	0	0	39	4169
CM	644	187	1	487	375	1	0	737	0	75	7	1178	1	2	15	0	8	330	507	0	4	14	3	672	9	30	32	15	0	21	16	17	413	93	1	0	947	0	90	0	0	2024	0	5104	12	0	0	139	6375
CM	426	828	1	1308	210	1	0	168	8	19	4	1046	1	4	77	4	12	333	220	0	0	121	1	507	9	12	8	54	1	79	5	7	347	22	9	11	301	0	34	0	0	803	0	1413	87	0	0	73	2546
PB	150	174	1	1495	322	1	0	43	0	22	106	516	0	23	4	0	1	70	220	0	0	11	2	58	2	9	1	24	0	21	3	1	593	0	1	0	586	0	8	0	0	15	0	31	12	0	0	5	201
PB	164	63	2	813	275	2	0	38	1	6	40	410	0	12	4	0	0	114	55	1	0	39	3	23	2	229	0	22	3	27	22	0	236	0	2	3	245	0	13	0	0	14	0	30	21	0	0	2	315
PB	28	6	0	15	854	1	0	1	0	0	1	6	0	1	1	0	0	225	6	0	0	3	1	3	3	0	0	1877	1	0	11	0	11	0	219	1	2	0	0	0	0	0	0	64	6	0	0	0	13
PB	3097	149	1	5084	201	3	0	668	7	29	200	8890	0	18	77	0	0	2000	25	0	1	6	2	468	2	387	2	25	2	611	2	1	171	3	2	1	96	0	13	0	0	37	0	86	25	0	0	3	350
CS	415	6	1	989	440	3	4	174	20	15	27	412	5	3	6	0	5	316	208	0	34	752	1271	11	22	3	0	19	1	717	70	2	1403	9	3	25	13	0	18	0	0	119	0	88	168	1	0	63	880
CS	750	3	2	2038	51	0	0	48	18	6	74	4279	1	299	21	0	1	363	44	0	0	39	674	154	16	0	1	18	1	344	118	1	807	5	1	1	6	0	40	0	0	75	0	81	30	0	0	66	747
CS	49	9	0	50	22	1	0	12	1	1	4	99	1	0	7	0	0	59	4	0	1	1	8	1	1	0	0	2	1	34	5	1	86	2	1	1	1	0	1	0	0	10	0	11	355	1	0	5	200
CS	109	7	1	108	110	0	0	83	0	0	3	323	0	7	3	0	0	64	6	0	0	5	7	12	4	21	1	11	2	75	2	1	88	2	4	0	44	0	0	0	0	4	0	12	164	0	0	1	150
[truncated: 1,515 more columns]
